# Supplementary material
Source: Royal Society of Chemistry journal article supplement (doi:10.1039/d6tc00638h)
Supplement: d6tc00638h1.pdf [file d6tc00638h1.pdf]

*Supporting Information for*

Promoting Electrons and Ions Transport by Self-assembled WO<sub>3</sub>/Mxene  
Composite Structure for Improved Electrochromic Performance

Kunming Zhao<sup>1,2</sup>, Hai Zhou<sup>1,2</sup>, Haining Qian<sup>1,2</sup>, Ruihui Peng<sup>2,3</sup>, Jianjun Zhao<sup>2</sup>, Guohua Wu<sup>1,2\*</sup>,

Xiangwei Wang<sup>1,2\*</sup>, Xuyang Zhang<sup>1,2\*</sup>

1. *College of Materials Science and Chemical Engineering, Harbin Engineering University,  
Harbin, 150001, Heilongjiang China*

2. *Qingdao Innovation and Development Center, Harbin Engineering University, Qingdao  
266000, Shandong, China*

3. *College of Information and Communication Engineering, Harbin Engineering University,  
Harbin, 150001, Heilongjiang China*

\*Corresponding author: ghwu@hrbeu.edu.cn; wangxiangwei@hrbeu.edu.cn;

xuyangz@hrbeu.edu.cn

**Supplementary Figures(Fig.S1-S8)**

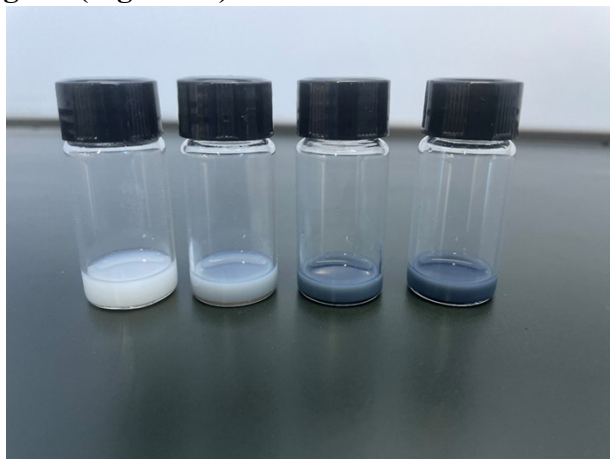

**Fig. S1** Precursor solutions of  $\text{WO}_3$  and  $\text{WO}_3/\text{MXene}$  (progressively increasing content of MXene 0 mg/mL, 0.25 mg/mL, 0.5 mg/mL, 1 mg/mL).

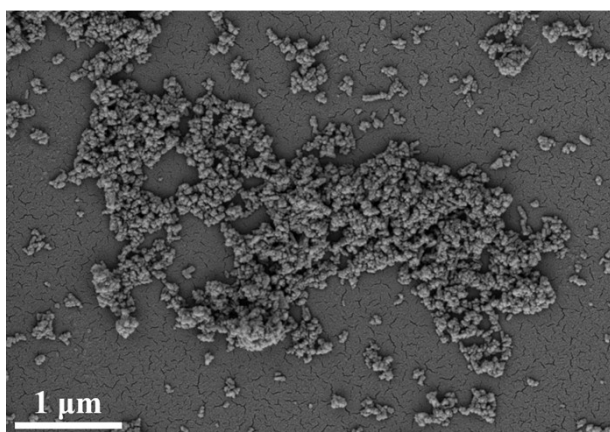

**Fig. S2** SEM images  $\text{WO}_3$  nanoparticle at low magnifications.

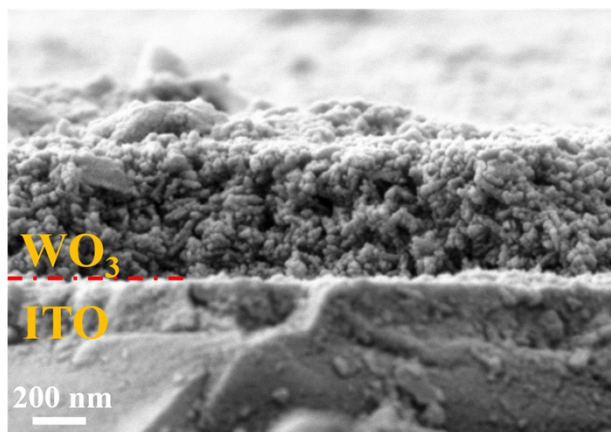

**Fig. S3** Surface SEM image of  $\text{WO}_3$  film.

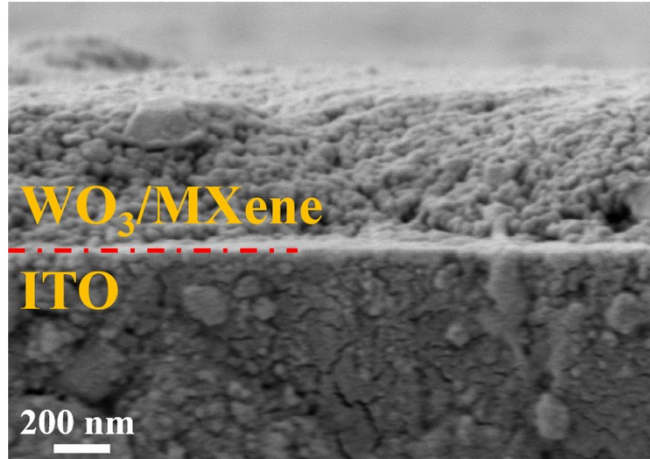

**Fig. S4** Surface SEM image of  $\text{WO}_3/\text{MXene}$  composite film.

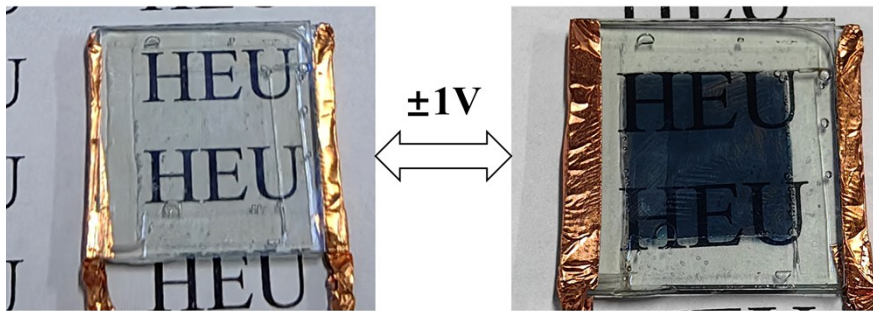

**Fig. S5** Optical photograph of the electrochromic device assembled from  $\text{WM}_{0.5}$ .

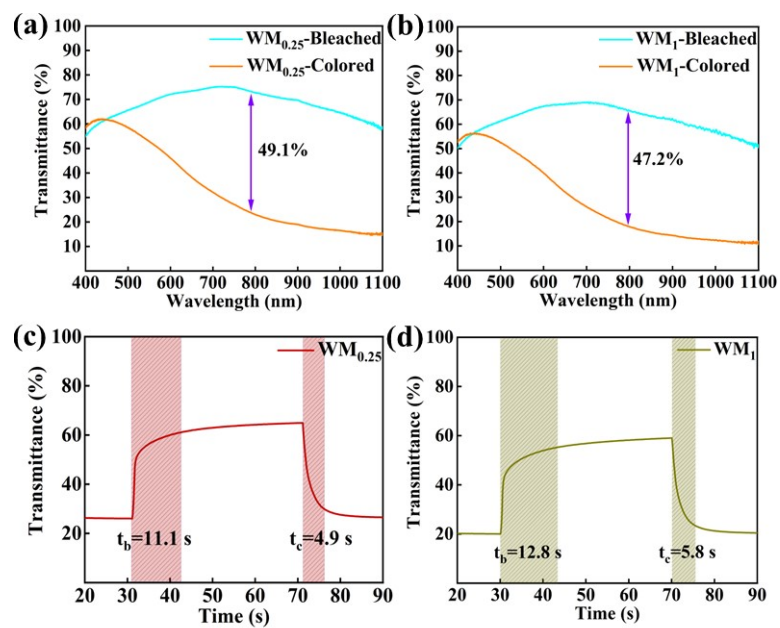

**Fig. S6** (a, b) Transmittance spectra of  $\text{WO}_3/\text{MXene}$  (0.25 mg/mL) and  $\text{WO}_3/\text{MXene}$  (1 mg/mL) electrochromic film in colored and bleached states; (c, d) In situ EC

switching kinetics at 780 nm wavelength of  $\text{WO}_3$  /MXene (0.25 mg/mL) and  $\text{WO}_3$  /MXene (1 mg/mL) electrochromic film.

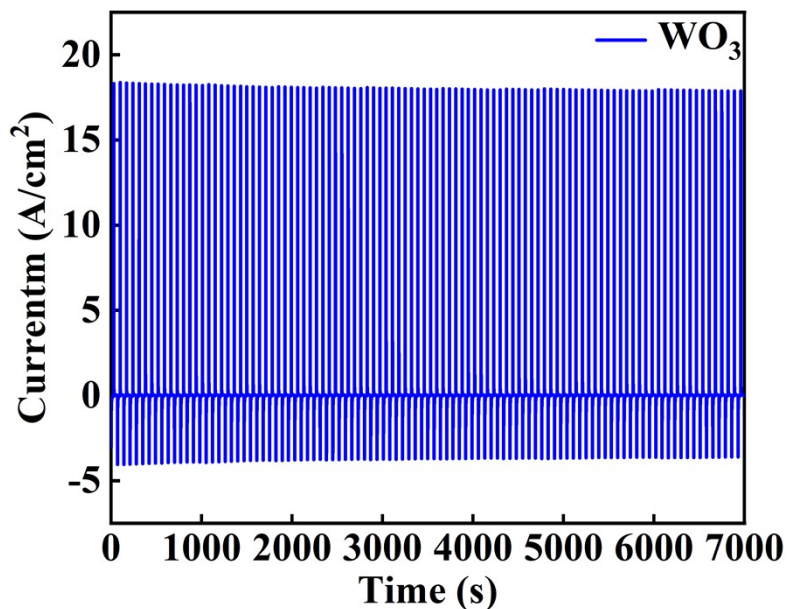

**Fig. S7** Cyclic stability test of  $\text{WO}_3$  film.

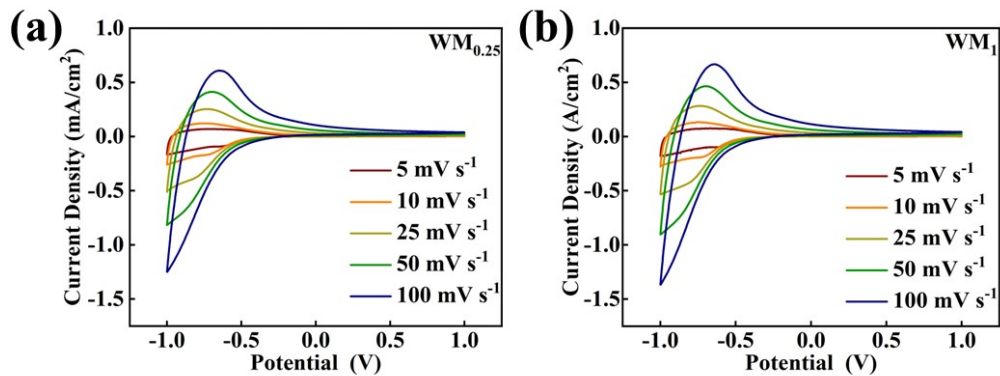

**Fig. S8** CV curves of (a)  $\text{WO}_3$  /MXene (0.25 mg/mL) and  $\text{WO}_3$  /MXene (1 mg/mL) at different scan rates.
